# Supplementary material for: Synthesis and microwave electromagnetic properties of nanosized titanium nitride
Source: Royal Society of Chemistry journal article supplement (doi:10.1039/c1jm13509k), 2012-01-01
Supplement: c1jm13509k.pdf [file c1jm13509k.pdf]

## Supporting Information

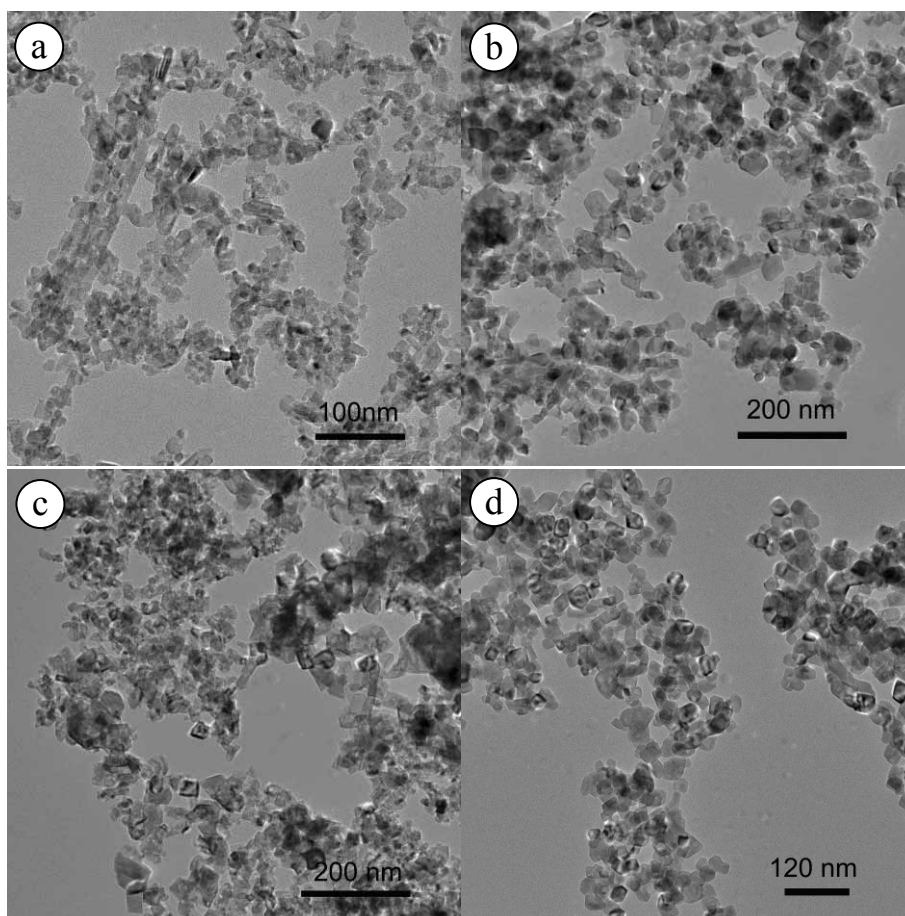

**Figure S1.** TEM pictures of (a) N-NTA (600), (b) N-NTA (700), (c) N-NTA (800), and (d) N- TiN.

Figure S1 shows the TEM micrographs of N-NTA nano-powders prepared at different temperatures. After treatment under an  $\text{NH}_3$  flow at  $T = 600\sim 700$  °C for 4 h, the nanotubular morphology of NTA is broken and converted into nanobundles ((a) and (b)). After treatment under an  $\text{NH}_3$  flow at  $T = 800\sim 900$  °C for 4 h ((c) and (d)), nanoparticles with loose agglomerate are harvested.

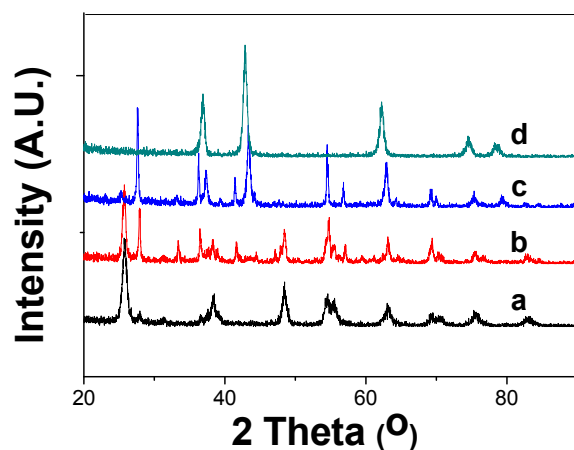

**Figure S2.** XRD patterns of (a) N- NTA (600), (b) N- NTA (700), (c) N-NTA (800), and (d) N-TiN.

The effect of the nitridation temperature on the powder phase composition is clearly illustrated in Figure S2. N-doped TiO<sub>2</sub> (anatase) is obtained by treating NTA in an NH<sub>3</sub> flow at  $T = 600$  °C. At the same time, NTA calcinated in NH<sub>3</sub> flow at 700~800 °C shows a low intensity of (101) XRD peak of anatase and new XRD peaks of TiN phase (JCPDS card No. 38-1420); and the one calcinated in flowing NH<sub>3</sub> at 900 °C shows only XRD signal of TiN phase.

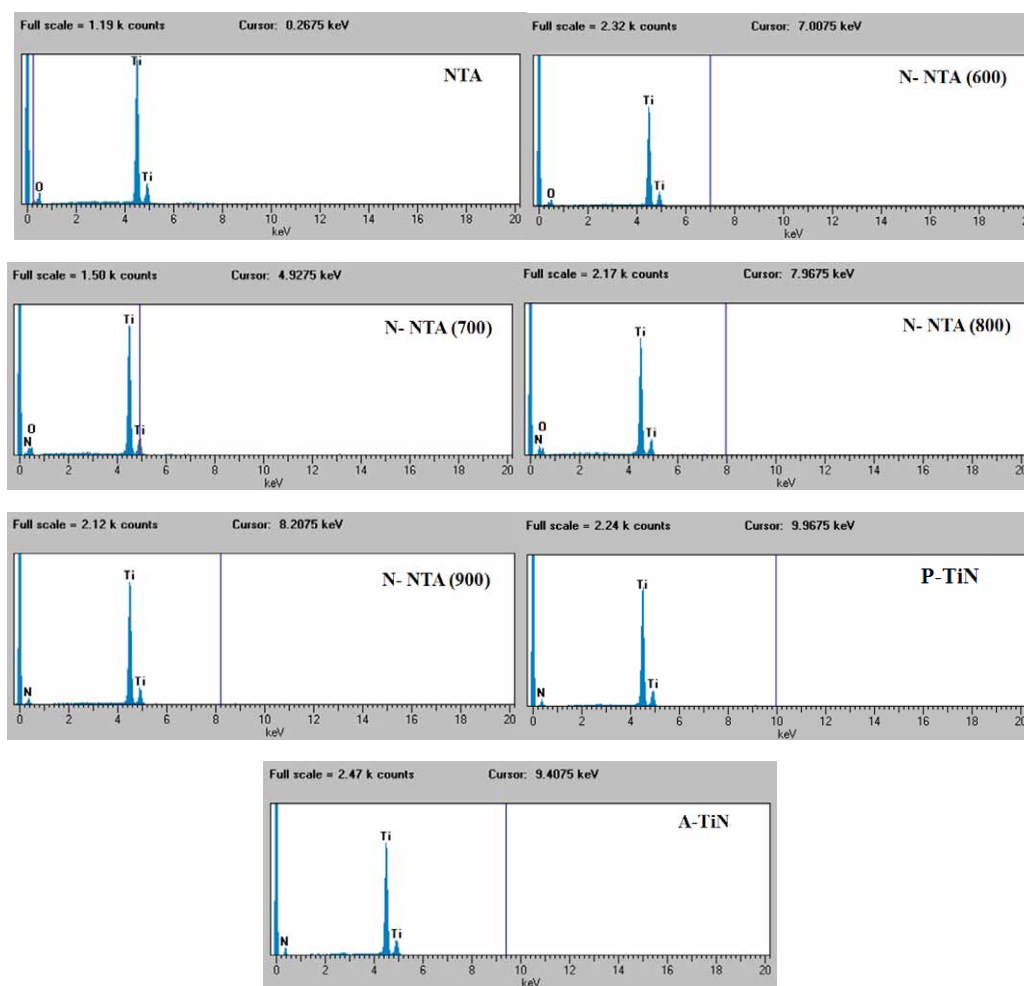

**Figure S3.** EDS spectra of NTA, N- NTA (600-900), P-TiN and A-TiN.

Figure S3 shows the main constituent elements (determined by EDS) of NTA, N-NTA (600-900) obtained at different temperatures and A-TiN. Only Ti and O are detected by EDS in NTA and N-NTA (600). When NTA is calcinated in  $\text{NH}_3$  flow at 700~800  $^\circ\text{C}$ , Ti, N, and O elements are detected in resultant N-NTA products. Only Ti and N are detected by EDS in N-TiN obtained at 900  $^\circ\text{C}$ , the same as P-TiN and A-TiN.

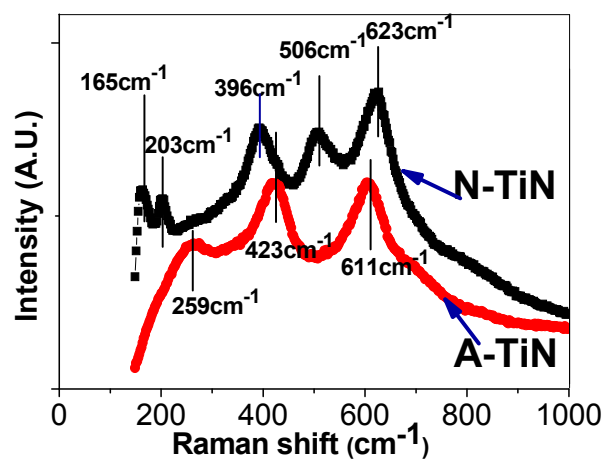

Figure S4. Raman spectra of as-prepared N-TiN and A-TiN.

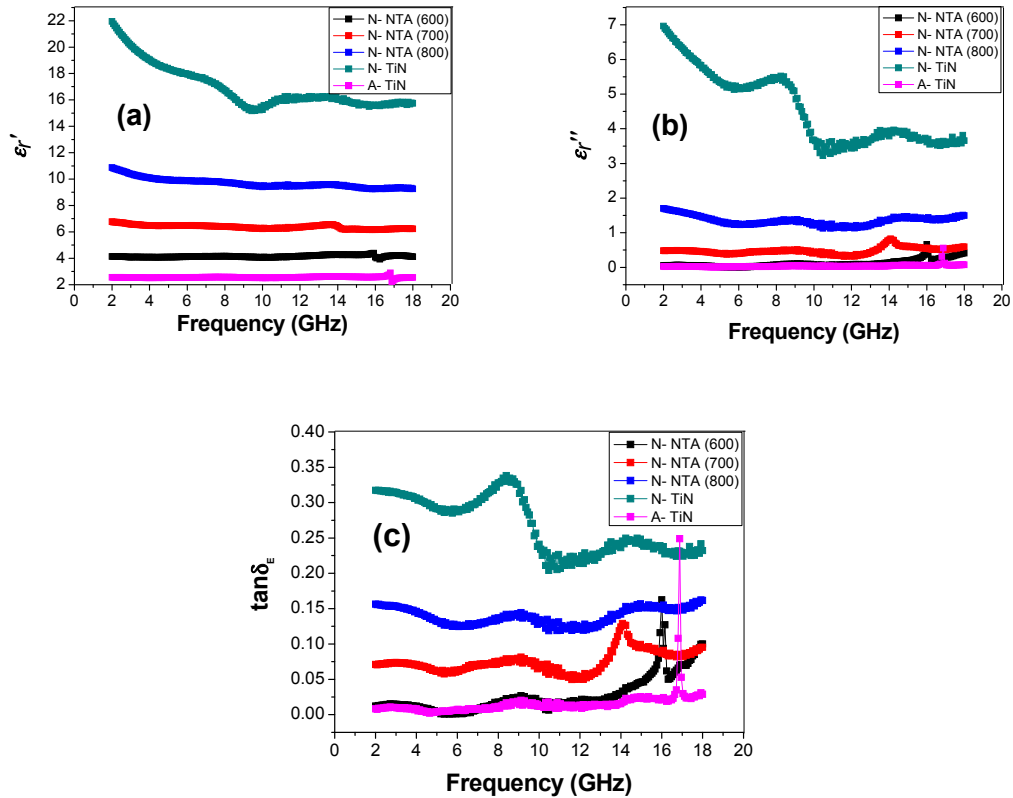

**Figure S5.** Real ( $\epsilon_r'$ ) (a) and imaginary ( $\epsilon_r''$ ) (b) parts of the relative complex permittivity and dielectric loss ( $\tan\delta_E$ ) (c) of N-NTA (600-900) and A-TiN filled paraffin composites in the frequency range of 2-18 GHz.

Figure S5 illustrates the real ( $\epsilon_r'$ ), imaginary parts ( $\epsilon_r''$ ) of the relative complex dielectric permittivity and dissipation factors versus frequency of the prepared N-NTA (600-900) and A-TiN imbedded in the paraffin wax composites versus the frequency. The  $\epsilon_r'$  and  $\epsilon_r''$  of A-TiN are very little and almost constant with nearly no variation throughout the whole frequency range, which has a very low dielectric loss at gigahertz frequency and the  $\tan\delta_E$  is limited at about 17 GHz, which means that the A-TiN is a typical dielectric material. The  $\epsilon_r'$ ,  $\epsilon_r''$  and  $\tan\delta_E$  of N-TiN (700-900) powder composite powder are all higher than those of A-TiN evidently.
